# Supplementary material for: Identification of Real-Life Mixtures Using Human Biomonitoring Data: A Proof of Concept Study
Source: MDPI journal article supplement (doi:10.3390/toxics11030204), 2023-02-22
Supplement: s1 [file s1]

5Supplementary Materials to:

# Identification of real-life mixtures using human biomonitoring data: a proof of concept study

Laura Rodriguez Martin <sup>1</sup>, Ilse Ottenbros <sup>2,3</sup>, Nina Vogel<sup>4</sup>, Marike Kolossa-Gehring<sup>4</sup>, Phillipp Schmidt<sup>4</sup>, Katarína Řiháčková<sup>5</sup>, Miguel Juliá Molina<sup>6</sup>, Elena Varea-Jiménez<sup>6</sup>, Eva Govarts<sup>1</sup>, Susana Pedraza-Díaz<sup>6</sup>, Erik Lebrecht<sup>2,3</sup>, Jelle Vlaanderen<sup>2</sup>, Mirjam Luijten <sup>7,\*</sup>

<sup>1</sup> Health, Flemish Institute for Technological Research (VITO), Mol, Belgium; laura.rodriquezmartin@vito.be; eva.govarts@vito.be

<sup>2</sup> Institute for Risk Assessment Sciences (IRAS), Utrecht University, Utrecht, The Netherlands;  
i.b.ottenbros@uu.nl; j.j.vlaanderen@uu.nl; lebrecht.ivi-consult@xs4all.nl

<sup>3</sup> Center for Sustainability, Environment and Health, National Institute for Public Health and the Environment, Bilthoven (RIVM), The Netherlands; Ilse.Ottenbros@rivm.nl; lebrecht.ivi-consult@xs4all.nl

<sup>4</sup> German Environment Agency (UBA), Berlin, Germany; Nina.Vogel@uba.de; marike.kolossa@uba.de;  
Phillipp.Schmidt@uba.de

<sup>5</sup> RECETOX, Faculty of Science, Masaryk University, Brno, Czech Republic; katarina.rihackova@recetox.muni.cz

<sup>6</sup> National Centre for Environmental Health, Instituto de Salud Carlos III, Majadahonda, Spain ; mjuliam@isci.es; evareaj@isci.es; spedraza@isci.es

<sup>7</sup> Centre for Health Protection, National Institute for Public Health and the Environment (RIVM), Bilthoven, The Netherlands; Mirjam.Luijten@rivm.nl

\* Correspondence: Mirjam.Luijten@rivm.nl; Tel.: +31 6 2549 7106

**Supplementary Table S1:** Descriptive statistics for biomarkers included in the network analysis for 3xG study. Urinary markers expressed as µg/g creatinine, blood values as µg/L.

| Substance group | Substance   | Biomarker |                                    | % < LOQ | P25  | P50  | P75  | P95  |
|-----------------|-------------|-----------|------------------------------------|---------|------|------|------|------|
| Elements        | Cadmium     | Cd        | Mothers, morning urine (µg/L)      | 0%      | 0.15 | 0.21 | 0.36 | 0.65 |
|                 | Cadmium     | Cd        | Newborns, cord blood (µg/L)        | 8%      | 0.02 | 0.03 | 0.04 | 0.05 |
|                 | Chromium    | Cr        | Mothers, morning urine (µg/L)      | 1.6%    | 0.24 | 0.39 | 0.66 | 1.4  |
|                 | Chromium    | Cr        | Newborns, cord blood (µg/L)        | 18%     | 0.14 | 0.24 | 0.57 | 1.3  |
|                 | Antimony    | Sb        | Mothers, morning urine (µg/L)      | 18%     | 0.02 | 0.04 | 0.06 | 0.09 |
|                 | Nickel      | Ni        | Mothers, morning urine (µg/L)      | 0%      | 1.3  | 1.7  | 2.6  | 4.7  |
|                 | Nickel      | Ni        | Newborns, cord blood (µg/L)        | 37%     | <LOD | 0.12 | 0.2  | 1.2  |
|                 | Copper      | Cu        | Mothers, morning urine (µg/L)      | 0%      | 9.3  | 12   | 17   | 29   |
|                 | Copper      | Cu        | Newborns, cord blood (µg/L)        | 0%      | 540  | 576  | 626  | 698  |
|                 | Arsenic     | As        | Mothers, morning urine (µg/L)      | 0%      | 0.8  | 1.2  | 2.1  | 4.5  |
|                 | Arsenic     | As        | Newborns, cord blood (µg/L)        | 0%      | 0.5  | 0.89 | 1.6  | 3.3  |
|                 | Lead        | Pb        | Mothers, morning urine (µg/L)      | 0%      | 0.51 | 0.76 | 1    | 1.7  |
|                 | Lead        | Pb        | Newborns, cord blood (µg/L)        | 0%      | 5    | 6    | 7    | 10   |
|                 | Manganese   | Mn        | Newborns, cord blood (µg/L)        | 0%      | 28   | 35   | 44   | 67   |
|                 | Thallium    | Tl        | Mothers, morning urine (µg/L)      | 0%      | 0.11 | 0.18 | 0.26 | 0.36 |
|                 | Thallium    | Tl        | Newborns, cord blood (µg/L)        | 0%      | 0.01 | 0.02 | 0.02 | 0.04 |
| Phthalates      | DEHP        | MEHP      | Mothers, morning urine (µg/L)      | 2.4%    | 1.3  | 1.9  | 3.8  | 8.5  |
|                 |             | OH-MEHP   | Mothers, morning urine (µg/L)      | 0%      | 5.3  | 8.2  | 13   | 34   |
|                 |             | oxo-MEHP  | Mothers, morning urine (µg/L)      | 0%      | 3.9  | 5.7  | 9.3  | 20   |
|                 | BBzP        | MBzP      | Mothers, morning urine (µg/L)      | 0%      | 3    | 5.8  | 11   | 26   |
|                 | DnBP        | MnBP      | Mothers, morning urine (µg/L)      | 0%      | 18   | 28   | 45   | 119  |
|                 | DiBP        | MiBP      | Mothers, morning urine (µg/L)      | 0%      | 34   | 46   | 79   | 276  |
|                 | DEP         | MEP       | Mothers, morning urine (µg/L)      | 0%      | 12   | 34   | 77   | 189  |
| Bisphenols      | Bisphenol A | BPA       | Mothers, morning urine (µg/L)      | 2.4%    | 0.8  | 1.2  | 2.1  | 4.5  |
| PCBs            | PCB 138     | PCB 138   | Newborns, cord blood plasma (µg/L) | 6.4%    | 0.02 | 0.03 | 0.03 | 0.05 |

| Substance group               | Substance                         | Biomarker | % < LOQ                            | P25   | P50  | P75  | P95  |      |
|-------------------------------|-----------------------------------|-----------|------------------------------------|-------|------|------|------|------|
| Persistent organic pollutants | PCB 153                           | PCB 153   | Newborns, cord blood plasma (µg/L) | 1.6%  | 0.03 | 0.04 | 0.05 | 0.09 |
|                               | PCB 180                           | PCB 180   | Newborns, cord blood plasma (µg/L) | 5.6%  | 0.02 | 0.02 | 0.04 | 0.07 |
|                               | Dichlorodiphenyldi-chloroethylene | DDE       | Newborns, cord blood plasma (µg/L) | 0%    | 0.09 | 0.15 | 0.26 | 0.53 |
|                               | Hexachlorobenzene                 | HCB       | Newborns, cord blood plasma (µg/L) | 24.8% | 0.01 | 0.01 | 0.02 | 0.03 |
| PFASs                         | PFOA                              | PFOA      | Newborns, cord blood plasma (µg/L) | 0%    | 0.77 | 1.1  | 1.4  | 2.1  |
|                               | PFHxS                             | PFHxS     | Newborns, cord blood plasma (µg/L) | 20.8% | 0.21 | 0.34 | 0.46 | 0.76 |
|                               | PFOS                              | PFOS      | Newborns, cord blood plasma (µg/L) | 0%    | 1.1  | 1.6  | 2.2  | 3.6  |
| Musks                         | Galaxolide                        | HHCB      | Mothers, blood (µg/L)              | 0%    | 230  | 282  | 359  | 543  |
|                               | Tonalide                          | AHTN      | Mothers, blood (µg/L)              | 0.8%  | 50   | 63   | 81   | 186  |

**Supplementary Table S2:** Descriptive statistics for biomarkers included in the network analysis for the CELSPAC – FIREexpo study. Urinary markers expressed as µg/g creatinine, blood values as µg/L.

| Study population | Substance group          | Biomarker            | % <LOQ | LOQ   | P10  | P25  | P50  | P75  | P90  |
|------------------|--------------------------|----------------------|--------|-------|------|------|------|------|------|
| Firefighters     | Blood serum (ng/ml)      |                      |        |       |      |      |      |      |      |
|                  | PFASs                    | PFOA                 | 0      | 0.07  | 0.66 | 0.92 | 1.2  | 1.5  | 1.9  |
|                  |                          | PFNA                 | 0      | 0.004 | 0.23 | 0.29 | 0.40 | 0.54 | 0.63 |
|                  |                          | PFDA                 | 0      | 0.004 | 0.10 | 0.14 | 0.19 | 0.25 | 0.30 |
|                  |                          | PFUnDA               | 12     | 0.012 | <LOQ | 0.04 | 0.05 | 0.07 | 0.10 |
|                  |                          | PFBS                 | 27     | 0.04  | <LOQ | <LOQ | 0.15 | 0.18 | 0.25 |
|                  |                          | PFHxS                | 0      | 0.004 | 0.3  | 0.38 | 0.49 | 0.67 | 0.76 |
|                  |                          | PFHpS                | 3.9    | 0.005 | 0.04 | 0.06 | 0.08 | 0.10 | 0.14 |
|                  |                          | PFOS                 | 0      | 0.03  | 1.7  | 2.4  | 3.2  | 4.8  | 6.4  |
|                  | Morning urine (µg/g CRT) |                      |        |       |      |      |      |      |      |
|                  | PAHs                     | 1-NAPH               | 0      | 0.006 | 0.52 | 0.99 | 1.6  | 2.6  | 3.6  |
|                  |                          | 2-NAPH               | 0      | 0.006 | 1.4  | 2.9  | 4.2  | 6.2  | 9.5  |
|                  |                          | 2-FLUO               | 0      | 0.006 | 0.14 | 0.19 | 0.26 | 0.32 | 0.48 |
|                  |                          | 3-FLUO               | 5.8    | 0.006 | 0.02 | 0.04 | 0.06 | 0.11 | 0.16 |
|                  |                          | 1-PHEN               | 38     | 0.006 | <LOQ | <LOQ | 0.02 | 0.04 | 0.10 |
|                  |                          | Σ(2-PHEN+<br>3-PHEN) | 0      | 0.006 | 0.07 | 0.10 | 0.14 | 0.20 | 0.30 |
|                  |                          | 4-PHEN               | 1.9    | 0.006 | 0.04 | 0.21 | 0.32 | 0.50 | 0.59 |
|                  |                          | 1-PYR                | 0      | 0.006 | 0.04 | 0.05 | 0.07 | 0.10 | 0.14 |
| Control group    | Blood serum (ng/ml)      |                      |        |       |      |      |      |      |      |
|                  | PFASs                    | PFPeA                | 16     | 0.036 | <LOQ | 0.18 | 0.22 | 0.26 | 0.31 |
|                  |                          | PFHxA                | 7.3    | 0.04  | 0.05 | 0.07 | 0.08 | 0.10 | 0.11 |
|                  |                          | PFOA                 | 1.8    | 0.07  | 0.49 | 0.69 | 0.90 | 1.1  | 1.4  |
|                  |                          | PFNA                 | 0      | 0.004 | 0.18 | 0.23 | 0.30 | 0.36 | 0.41 |
|                  |                          | PFDA                 | 0      | 0.004 | 0.08 | 0.11 | 0.12 | 0.17 | 0.23 |

|  |                                 |                      |     |       |      |      |      |      |      |
|--|---------------------------------|----------------------|-----|-------|------|------|------|------|------|
|  |                                 | PFUnDA               | 3.6 | 0.012 | 0.03 | 0.05 | 0.07 | 0.10 | 0.11 |
|  |                                 | PFHxS                | 0   | 0.004 | 0.27 | 0.33 | 0.43 | 0.52 | 0.65 |
|  |                                 | PFHpS                | 36  | 0.005 | <LOQ | <LOQ | 0.04 | 0.07 | 0.09 |
|  |                                 | PFOS                 | 0   | 0.03  | 1.1  | 1.7  | 2.2  | 2.7  | 3.5  |
|  | Morning urine (µg/g creatinine) |                      |     |       |      |      |      |      |      |
|  | PAHs                            | 1-NAPH               | 0   | 0.006 | 0.34 | 0.58 | 0.93 | 1.3  | 2.3  |
|  |                                 | 2-NAPH               | 0   | 0.006 | 1.3  | 1.7  | 2.8  | 4.1  | 5.3  |
|  |                                 | 2-FLUO               | 0   | 0.006 | 0.09 | 0.13 | 0.18 | 0.25 | 0.31 |
|  |                                 | 3-FLUO               | 3.6 | 0.006 | 0.01 | 0.02 | 0.03 | 0.05 | 0.07 |
|  |                                 | 1-PHEN               | 5.5 | 0.006 | 0.02 | 0.05 | 0.09 | 0.12 | 0.20 |
|  |                                 | Σ(2-PHEN+<br>3-PHEN) | 0   | 0.006 | 0.06 | 0.09 | 0.12 | 0.20 | 0.28 |
|  |                                 | 4-PHEN               | 20  | 0.006 | <LOQ | 0.01 | 0.02 | 0.04 | 0.35 |
|  |                                 | 1-PYR                | 0   | 0.006 | 0.02 | 0.03 | 0.04 | 0.06 | 0.09 |

**Supplementary Table S3:** Descriptive statistics for biomarkers included in the network analysis for the GerEs V study. Urinary markers expressed as µg/g creatinine, blood values as µg/L.

| Substance group       | Substance | Biomarker | N < LOQ | % < LOQ | LOQ  | P05   | P10   | P25   | P50   | P75   | P90    | P95    | GM    |
|-----------------------|-----------|-----------|---------|---------|------|-------|-------|-------|-------|-------|--------|--------|-------|
| Elements              | Cadmium   | Cd        | 134     | 26.02 % | 0.05 | < LOQ | < LOQ | < LOQ | 0.06  | 0.09  | 0.12   | 0.15   | 0.06  |
|                       | Chromium  | Cr        | 40      | 7.77 %  | 0.2  | < LOQ | 0.2   | 0.26  | 0.34  | 0.49  | 0.62   | 0.77   | 0.36  |
|                       | Mercury   | Hg        | 26      | 5.05 %  | 0.02 | < LOQ | 0.02  | 0.04  | 0.06  | 0.1   | 0.19   | 0.26   | 0.06  |
|                       | Antimony  | Sb        | 108     | 20.97 % | 0.04 | < LOQ | < LOQ | 0.03  | 0.05  | 0.07  | 0.1    | 0.13   | 0.05  |
|                       | Selenium  | Se        | 0       | 0 %     | 0.5  | 15.09 | 16.81 | 21.17 | 27.8  | 37.95 | 47.93  | 57.08  | 28.34 |
|                       | Arsenic   | As        | 0       | 0 %     | 0.1  | 2.45  | 2.93  | 4.35  | 6.89  | 14.17 | 30.5   | 55.21  | 8.42  |
| Aprotic solvents      |           | HNMP      | 0       | 0 %     | 2.5  | 17.78 | 22.73 | 31.79 | 48.6  | 73.76 | 107.36 | 152.65 | 49.71 |
|                       |           | HMSI      | 0       | 0 %     | 2    | 15.6  | 19.62 | 26.81 | 37.15 | 57.12 | 84.41  | 104.4  | 39.32 |
|                       |           | HESI      | 66      | 12.82 % | 2    | < LOQ | < LOQ | 2.58  | 4.68  | 10.2  | 39.19  | 70.35  | 5.87  |
| Acrylamide            |           | AAMA      | 0       | 0 %     | 1    | 26.84 | 32.62 | 43.56 | 60.5  | 84.27 | 125.31 | 189.67 | 63.22 |
|                       |           | GAMA      | 0       | 0 %     | 1    | 5.52  | 6.79  | 8.96  | 12.53 | 17.66 | 24.62  | 28.84  | 12.74 |
| Phthalate substitutes | DEHTP     | OH-MEHTP  | 171     | 33.2 %  | 0.3  | < LOQ | < LOQ | < LOQ | 0.41  | 1.13  | 2.59   | 4.23   | 0.48  |
|                       |           | oxo-MEHTP | 103     | 20 %    | 0.2  | < LOQ | < LOQ | 0.19  | 0.46  | 1.06  | 2.28   | 3.83   | 0.47  |
|                       |           | cx-MEPTP  | 0       | 0 %     | 0.2  | 1.1   | 1.51  | 2.85  | 6.22  | 15.45 | 36.64  | 54.09  | 6.76  |
|                       | DINCH     | cx-MINCH  | 1       | 0.19 %  | 0.05 | 0.21  | 0.29  | 0.49  | 1.02  | 2.11  | 4.91   | 7.8    | 1.08  |
|                       |           | OH-MINCH  | 1       | 0.19 %  | 0.05 | 0.41  | 0.54  | 0.98  | 2.13  | 4.66  | 9.48   | 14.72  | 2.22  |
|                       |           | oxo-MINCH | 8       | 1.55 %  | 0.05 | 0.15  | 0.21  | 0.39  | 0.93  | 2.03  | 4.6    | 7.16   | 0.94  |
| Phthalates            | DEHP      | MEHP      | 67      | 13.01 % | 0.5  | < LOQ | < LOQ | 0.71  | 1.22  | 2.04  | 3.35   | 4.19   | 1.2   |
|                       |           | 5OH-MEHP  | 0       | 0 %     | 0.2  | 3.12  | 3.94  | 5.87  | 8.98  | 13.94 | 21.69  | 28.84  | 9.25  |
|                       |           | 5oxo-MEHP | 0       | 0 %     | 0.2  | 1.96  | 2.52  | 4.08  | 6.42  | 10.49 | 15.89  | 21.63  | 6.47  |
|                       |           | 5cx-MEPP  | 0       | 0 %     | 0.2  | 3.45  | 4.03  | 6.1   | 9.92  | 16.9  | 26.26  | 35.81  | 10.17 |
|                       | BBzP      | MBzP      | 2       | 0.39 %  | 0.2  | 0.69  | 0.9   | 1.45  | 2.38  | 4.75  | 10.36  | 17.46  | 2.77  |
|                       | DnBP      | MnBP      | 0       | 0 %     | 1    | 6.05  | 7.81  | 12.04 | 18.18 | 28.67 | 40.34  | 54.79  | 18.39 |
|                       |           | OH-MnBP   | 4       | 0.78 %  | 0.25 | 0.6   | 0.78  | 1.25  | 2.12  | 3.49  | 5.24   | 7.27   | 2.11  |
|                       | DiBP      | MiBP      | 0       | 0 %     | 1    | 7.29  | 9.04  | 13.54 | 21.36 | 33.58 | 58.2   | 87.22  | 22.34 |

| Substance group | Substance          | Biomarker | N < LOQ | % < LOQ | LOQ   | P05   | P10   | P25   | P50   | P75   | P90    | P95    | GM    |
|-----------------|--------------------|-----------|---------|---------|-------|-------|-------|-------|-------|-------|--------|--------|-------|
|                 | DEP                | OH-MiBP   | 0       | 0 %     | 0.25  | 2.28  | 3.02  | 4.7   | 7.52  | 12.17 | 21.02  | 30.15  | 7.78  |
|                 |                    | MEP       | 0       | 0 %     | 0.5   | 5.09  | 6.83  | 10.96 | 17.76 | 32.05 | 65.95  | 113.45 | 19.75 |
|                 | DiNP               | OH-MiNP   | 0       | 0 %     | 0.2   | 1.88  | 2.28  | 3.35  | 5.27  | 8.73  | 15.12  | 24.62  | 5.76  |
|                 |                    | oxo-MiNP  | 0       | 0 %     | 0.2   | 0.73  | 0.92  | 1.39  | 2.17  | 3.66  | 6.35   | 9.65   | 2.36  |
|                 |                    | cx-MiNP   | 0       | 0 %     | 0.2   | 1.52  | 1.82  | 2.88  | 4.55  | 7.5   | 12.48  | 19.47  | 4.87  |
|                 | DiDP               | OH-MiDP   | 4       | 0.78 %  | 0.2   | 0.37  | 0.47  | 0.75  | 1.19  | 2.06  | 3.54   | 5.9    | 1.28  |
|                 |                    | oxo-MiDP  | 54      | 10.49 % | 0.2   | < LOQ | < LOQ | 0.29  | 0.54  | 0.89  | 1.55   | 2.56   | 0.54  |
|                 |                    | cx-MiDP   | 11      | 2.14 %  | 0.2   | 0.24  | 0.3   | 0.41  | 0.7   | 1.19  | 2.2    | 3.62   | 0.76  |
|                 | DPHP               | oxo-MPHP  | 184     | 35.73 % | 0.25  | < LOQ | < LOQ | < LOQ | 0.27  | 0.54  | 1.01   | 1.57   | 0.29  |
|                 | DMP                | MMP       | 8       | 1.55 %  | 1     | 1.49  | 1.93  | 3.21  | 5.07  | 10.44 | 21.45  | 36     | 6.02  |
| PAHs            |                    | 1-OH-Nap  | 18      | 3.5 %   | 0.05  | 0.11  | 0.19  | 0.36  | 0.68  | 1.41  | 3.42   | 4.88   | 0.7   |
|                 |                    | 2-OH-Nap  | 1       | 0.19 %  | 0.05  | 0.92  | 1.15  | 1.86  | 3.15  | 5.89  | 11.06  | 15.89  | 3.38  |
|                 |                    | 2-OH-Flu  | 54      | 10.49 % | 0.05  | < LOQ | < LOQ | 0.23  | 0.43  | 0.69  | 1.27   | 2.19   | 0.36  |
|                 |                    | 1-OH-Phe  | 0       | 0 %     | 0.005 | 0.04  | 0.05  | 0.08  | 0.12  | 0.2   | 0.34   | 0.46   | 0.13  |
|                 |                    | 2-OH-Phe  | 4       | 0.78 %  | 0.005 | 0.03  | 0.03  | 0.05  | 0.07  | 0.11  | 0.18   | 0.28   | 0.08  |
|                 |                    | 3-OH-Phe  | 0       | 0 %     | 0.005 | 0.05  | 0.05  | 0.08  | 0.11  | 0.18  | 0.3    | 0.4    | 0.12  |
|                 |                    | 4-OH-Phe  | 2       | 0.39 %  | 0.001 | 0.01  | 0.01  | 0.02  | 0.04  | 0.08  | 0.18   | 0.26   | 0.04  |
|                 |                    | 9-OH-Phe  | 14      | 2.72 %  | 0.005 | 0.01  | 0.02  | 0.03  | 0.05  | 0.09  | 0.19   | 0.28   | 0.05  |
| Parabens        |                    | 1-OH-Pyr  | 7       | 1.36 %  | 0.01  | 0.03  | 0.04  | 0.06  | 0.09  | 0.14  | 0.22   | 0.29   | 0.09  |
|                 |                    |           |         |         |       |       |       |       |       |       |        |        |       |
| Parabens        | Methylparaben      | MeP       | 13      | 2.52 %  | 0.5   | 0.8   | 1.04  | 1.9   | 4.37  | 19.61 | 122.99 | 321.93 | 7.02  |
|                 | Ethylparaben       | EP        | 164     | 31.84 % | 0.5   | < LOQ | < LOQ | < LOQ | 0.62  | 1.42  | 4.38   | 10.39  | 0.72  |
| Bisphenols      | Bisphenol A        | BPA       | 19      | 3.69 %  | 0.5   | 0.52  | 0.67  | 1.03  | 1.6   | 2.88  | 4.8    | 6.91   | 1.77  |
| Other           | Lysmeral           | TBBA      | 0       | 0 %     | 0.2   | 2.12  | 2.87  | 4.49  | 8.16  | 15.45 | 24.19  | 35.56  | 8.49  |
|                 | CIT/MIT            | NMMA      | 0       | 0 %     | 0.5   | 2.48  | 2.99  | 3.92  | 5.31  | 7.53  | 10.24  | 12.2   | 5.47  |
|                 | Butylhydroxytoluol | BHT       | 1       | 0.19 %  | 0.2   | 0.58  | 0.73  | 1.23  | 1.98  | 3.45  | 6.22   | 9.52   | 2.1   |
|                 | Benzene            | SPMA      | 12      | 2.33 %  | 0.02  | 0.02  | 0.03  | 0.05  | 0.08  | 0.14  | 0.26   | 0.44   | 0.09  |

**Supplementary Table S4:** Descriptive statistics for biomarkers included in the network analysis for the BIOAMBIENT.ES study. Urinary markers expressed as µg/g creatinine, blood values as µg/L.

| Substance group | Substance | Biomarker | N < LOQ | % < LOQ | LOQ  | P05   | P10   | P25   | P50    | P75         | P90    | P95     | GM         |
|-----------------|-----------|-----------|---------|---------|------|-------|-------|-------|--------|-------------|--------|---------|------------|
| Metals          | Mercury   | Hg        | 1       | 0.68    | 0.10 | 0.21  | 0.31  | 0.56  | 0.99   | 1.58        | 2.3    | 2.75    | 0.88       |
|                 | Cadmium   | Cg        | 4       | 2.45    | 0.05 | 0.05  | 0.07  | 0.12  | 0.2    | 0.38        | 0.59   | 0.72    | 0.2        |
|                 | Lead      | Pb        | 4       | 2.6     | 0.10 | 0.19  | 0.29  | 0.43  | 0.7    | 1.04        | 1.67   | 2.36    | 0.69       |
|                 | Thallium  | Tl        | 16      | 11.35   | 0.05 | 0.05  | 0.06  | 0.08  | 0.11   | 0.16        | 0.21   | 0.26    | 0.11       |
|                 | Cobalt    | Co        | 2       | 1.46    | 0.05 | 0.2   | 0.23  | 0.36  | 0.57   | 0.84        | 1.28   | 2.2     | 0.58       |
| Phthalates      | DMP       | MMP       | 8       | 4.91    | 1    | 1.12  | 1.46  | 2.01  | 2.69   | 4.2         | 7.08   | 10.56   | 3.14       |
|                 | DEP       | MEP       | 0       | 0       | 0.5  | 25.81 | 39.64 | 87.08 | 189.47 | 345.2<br>10 | 802.21 | 1307.09 | 189.2<br>4 |
|                 | BBzP      | MBzP      | 2       | 1.23    | 0.2  | 1.77  | 2.27  | 3.16  | 5.09   | 8.98        | 16.24  | 28.53   | 5.69       |
|                 | DiBP      | MiBP      | 0       | 0       | 1    | 8.37  | 10.89 | 16.33 | 23.71  | 34.19       | 51.71  | 72.73   | 24.04      |
|                 |           | OH-MiBP   | 0       | 0       | 0.25 | 3.71  | 4.77  | 6.5   | 9.17   | 14.19       | 19.14  | 25.01   | 9.58       |
|                 |           | MnBP      | 1       | 0.61    | 1    | 4.76  | 6.04  | 9.63  | 14.74  | 22.23       | 33.4   | 41.53   | 14.54      |
|                 | DnBP      | OH-MnBP   | 4       | 2.45    | 0.25 | 0.56  | 0.72  | 1.08  | 1.71   | 2.44        | 3.52   | 5.04    | 1.65       |
|                 |           | MCPP      | 22      | 13.5    | 0.50 | 0.42  | 0.51  | 0.71  | 0.95   | 1.52        | 2.2    | 2.9     | 1.07       |
|                 |           | MEHP      | 6       | 3.68    | 0.50 | 1.08  | 1.43  | 2.47  | 4.09   | 6.63        | 11.32  | 14.9    | 3.97       |
|                 | DEHP      | OH-MEHP   | 0       | 0       | 0.20 | 6.24  | 7.89  | 11.54 | 18.44  | 26.26       | 39.22  | 56.6    | 17.75      |
|                 |           | oxo-MEHP  | 1       | 0.61    | 0.20 | 3.63  | 4.86  | 7.74  | 11.45  | 17.03       | 27.82  | 35.71   | 11.56      |
|                 |           | cx-MEPP   | 0       | 0       | 0.20 | 7.24  | 8.29  | 12.82 | 18.88  | 28.15       | 43.43  | 54.27   | 19.19      |
|                 | DiNP      | OH-MiNP   | 3       | 1.84    | 0.20 | 0.99  | 1.28  | 2.03  | 3.45   | 5.91        | 10.97  | 23.17   | 3.62       |
|                 |           | oxo-MiNP  | 5       | 3.07    | 0.20 | 0.50  | 0.71  | 1.19  | 2.08   | 3.62        | 6.71   | 14.93   | 2.2        |
|                 |           | cx-MiNP   | 1       | 0.61    | 0.20 | 0.63  | 0.76  | 1.05  | 1.43   | 2.27        | 3.61   | 4.87    | 1.59       |
|                 |           | OH-MiDP   | 3       | 1.84    | 0.20 | 0.7   | 0.9   | 1.23  | 1.76   | 2.83        | 4.09   | 5.11    | 1.84       |
|                 | DiDP      | oxo-MiDP  | 17      | 10.43   | 0.20 | 0.25  | 0.29  | 0.42  | 0.62   | 0.95        | 1.49   | 1.82    | 0.64       |
|                 |           | cx-MiDP   | 1       | 0.61    | 0.20 | 0.63  | 0.76  | 1.05  | 1.43   | 2.27        | 3.61   | 4.87    | 1.59       |
| DINCH           | DINCH     | OH-DINCH  | 8       | 4.91    | 0.05 | 0.1   | 0.15  | 0.29  | 0.7    | 1.9         | 6.81   | 19.82   | 0.85       |



| Substance group | Substance | Biomarker | N < LOQ | % < LOQ | LOQ  | P05  | P10  | P25  | P50  | P75   | P90   | P95   | GM   |
|-----------------|-----------|-----------|---------|---------|------|------|------|------|------|-------|-------|-------|------|
|                 |           | cx-MINCH  | 6       | 3.68    | 0.05 | 0.09 | 0.14 | 0.26 | 0.43 | 1.22  | 4.3   | 8.21  | 0.64 |
|                 |           | oxo-DINCH | 22      | 13.5    | 0.05 | 0.03 | 0.04 | 0.11 | 0.35 | 1.19  | 4.6   | 11.87 | 0.4  |
| PFAS            | PFHxS     | PFHXS     | 34      | 20.86   | 0.34 | 0.24 | 0.24 | 0.39 | 0.68 | 1.13  | 1.99  | 2.39  | 0.70 |
|                 | PFOA      | PFOA      | 0       | 0       | 0.16 | 0.81 | 0.96 | 1.39 | 2.03 | 2.94  | 3.92  | 5.09  | 1.98 |
|                 | PFOS      | PFOS      | 2       | 1.23    | 0.33 | 2.48 | 3.53 | 5.30 | 8.09 | 11.02 | 15.18 | 17.11 | 7.25 |
|                 | PFNA      | PFNA      | 1       | 0.61    | 0.16 | 0.48 | 0.59 | 0.70 | 0.95 | 1.39  | 1.74  | 2.14  | 0.98 |
|                 | PFDA      | PFDA      | 18      | 11.04   | 0.2  | 0.14 | 0.14 | 0.26 | 0.37 | 0.53  | 0.75  | 0.84  | 0.37 |
